# Supplementary material for: Factors associated with HIV testing and counselling services among women and men in Nepal: a cross-sectional study using data from a nationally representative survey
Source: PubMed Central journal article supplement — BMJ Open. 2021 Dec 3;11(12):e049415. doi: 10.1136/bmjopen-2021-049415 (PMC8647541; doi:10.1136/bmjopen-2021-049415), 2021-12-03
Supplement: bmjopen-2021-049415supp001.pdf [file bmjopen-2021-049415supp001.pdf]

## Factors Associated with HIV Testing and Counselling Services among Women and Men in Nepal: A Cross-sectional Study Using Data from a Nationally Representative Survey

Navaraj Bhattarai<sup>1+</sup>, Kiran Bam<sup>2+</sup>, Kiran Acharya<sup>3\*+</sup>, Rajshree Thapa<sup>4</sup>, Bhagawan Shrestha<sup>2</sup>

<sup>1</sup> Nepal Public Health Research and Development Center, Kathmandu, Nepal

<sup>2</sup> Public Health Professional working in Nepal

<sup>3</sup> New ERA, Rudramati Marg, Kalopul, Kathmandu, 44621, Nepal

<sup>4</sup> Department of Medicine, Monash University, Melbourne, Australia

\*Correspondence to [acharya.kiran1@gmail.com](mailto:acharya.kiran1@gmail.com)

+ Contributed equally

**Supplementary Table 1: List of variables and their operational definitions**

| Independent Variables | Definitions                                                              | Categories                                                                                                                                                                                   |
|-----------------------|--------------------------------------------------------------------------|----------------------------------------------------------------------------------------------------------------------------------------------------------------------------------------------|
| Age (years)           | Completed age of the women and men at the time of data collection        | 1) 15-19<br>2) 20-24<br>3) 25-29<br>4) 30-39<br>5) 40-49                                                                                                                                     |
| Ethnicity             | Ethnic categories are that an individual's falls in the Nepalese context | 1) Hill Brahamin/Chettri<br>2) Terai Caste<br>3) Janajatis<br>4) Dalit/Muslims/Others                                                                                                        |
| Education             | Level of education classified as per the years of schooling/grades       | 1) No education<br>2) Primary (basic education with incomplete secondary education)<br>3) Secondary education (completed secondary education)<br>4) Higher education (higher than secondary) |
| Place of residence    | Residence areas of respondents                                           | 1) Urban<br>2) Rural                                                                                                                                                                         |

|                                |                                                                                                                                                                                                                                                                                                                                                   |                                                                                                                                                                                                                                                |
|--------------------------------|---------------------------------------------------------------------------------------------------------------------------------------------------------------------------------------------------------------------------------------------------------------------------------------------------------------------------------------------------|------------------------------------------------------------------------------------------------------------------------------------------------------------------------------------------------------------------------------------------------|
| Province                       | Administrative unit.                                                                                                                                                                                                                                                                                                                              | <ol style="list-style-type: none"> <li>1) Province no. 1</li> <li>2) Province no. 2</li> <li>3) Bagmati Province</li> <li>4) Gandaki Province</li> <li>5) Province 5</li> <li>6) Karnali Province</li> <li>7) Sudhuraschim Province</li> </ol> |
| Wealth quintile                | Composite measure of a household's cumulative living standard, calculated using easy-to-collect data on a household's ownership of selected assets, such as televisions and bicycles; materials used for housing construction; and types of water access and sanitation facilities. The wealth index score of each item is divided into quintile. | <ol style="list-style-type: none"> <li>1) Poorest</li> <li>2) Poorer</li> <li>3) Middle</li> <li>4) Richer</li> <li>5) Richest</li> </ol>                                                                                                      |
| Marital status                 | Current marital status of the respondents (women and men).                                                                                                                                                                                                                                                                                        | <ol style="list-style-type: none"> <li>1) Never married</li> <li>2) Married/living together</li> <li>3) Divorced/separated/widowed</li> </ol>                                                                                                  |
| Occupation                     | Women and men employed in the 12 months preceding the survey by occupation.                                                                                                                                                                                                                                                                       | <ol style="list-style-type: none"> <li>1) Didn't work</li> <li>2) Agricultural</li> <li>3) Professional/clerical</li> <li>4) Manual labor</li> </ol>                                                                                           |
| Comprehensive knowledge on HIV | Comprehensive knowledge means knowing that consistent use of condoms during sexual intercourse and having just one uninfected faithful partner can reduce the chance of getting HIV, knowing that a healthy-looking person can have HIV, and rejecting the two most common local misconceptions about transmission or prevention of HIV.          | <ol style="list-style-type: none"> <li>1) No</li> <li>2) Yes</li> </ol>                                                                                                                                                                        |
| HIV discriminatory behaviour   | HIV discriminatory behavior was asked among the respondents who have heard of HIV or AIDS and discriminatory attitude means those who do not think that children living with HIV should be able to attend                                                                                                                                         | <ol style="list-style-type: none"> <li>1) No</li> <li>2) Yes</li> </ol>                                                                                                                                                                        |

|                                         |                                                                                                                                                                                                                                                                                                             |                                                                      |
|-----------------------------------------|-------------------------------------------------------------------------------------------------------------------------------------------------------------------------------------------------------------------------------------------------------------------------------------------------------------|----------------------------------------------------------------------|
|                                         | school with children who are HIV negative or would not buy fresh vegetables from a shopkeeper who has HIV.                                                                                                                                                                                                  |                                                                      |
| Media exposure                          | Media exposure means reading a newspaper, watching television and listening to the radio.                                                                                                                                                                                                                   | 1) Not at all<br>2) At Least once a week<br>3) Less than once a week |
| Recent sexual activity                  | Women and men had sexual intercourse with a person that is not their spouse and does not live with them in the past 12 months.                                                                                                                                                                              | 1) No<br>2) Yes                                                      |
| Ever paid for sex                       | Those who ever paid anyone in exchange for having sexual intercourse.                                                                                                                                                                                                                                       | 1) No<br>2) Yes                                                      |
| Knowledge for treatment for HIV         | Knowledge for treatment for HIV was asked among the respondents who have heard of HIV or AIDS. This is the knowledge regarding the availability of HIV treatment.                                                                                                                                           | 1) No<br>2) Yes                                                      |
| Age at first sexual intercourse (years) | Age of woman or man in completed years when they had first sex.                                                                                                                                                                                                                                             | 1) <15<br>2) 15-19<br>3) 20-24<br>4) 25 and above                    |
| Number of lifetime sexual partners      | Women and men aged 15-49, who had two or more sexual partners in their lifetime.                                                                                                                                                                                                                            | 1) 1<br>2) 2+                                                        |
| Ever experienced sexual violence        | Sexual violence is defined as those women who have experienced any sexual violence (committed by a husband or anyone else) ever before the survey. Sexual violence questions were asked to the women age 15-49 from the selected households and who were chosen for administering domestic violence module. | 1) Not experienced<br>2) Experienced                                 |
| Received all 4 ANC                      | Women received ANC at 4, 6, 8, and 9 months and it is based on the number of women with ANC for                                                                                                                                                                                                             | 1) Not received<br>2) Received                                       |

|                             |                                                                                        |                                                                                                                                                                                              |
|-----------------------------|----------------------------------------------------------------------------------------|----------------------------------------------------------------------------------------------------------------------------------------------------------------------------------------------|
|                             | their most recent birth 5 years preceding the survey.                                  |                                                                                                                                                                                              |
| Women's partners' education | Level of education of women's husband classified as per the years of schooling/grades. | 1) No education<br>2) Primary (basic education with incomplete secondary education)<br>3) Secondary education (completed secondary education)<br>4) Higher education (higher than secondary) |
| Place of recent delivery    | Women who had delivered in the 5 years preceding the survey.                           | 1) Elsewhere<br>2) Health facility                                                                                                                                                           |

**Supplementary table 2: Unadjusted and Adjusted Odds Ratio (OR) of HIV testing among women and men**

| Characteristics      | Women                  |                      | Men                    |                      |
|----------------------|------------------------|----------------------|------------------------|----------------------|
|                      | Unadjusted OR (95% CI) | Adjusted OR (95% CI) | Unadjusted OR (95% CI) | Adjusted OR (95% CI) |
| Age                  |                        |                      |                        |                      |
| 15-19                | ref.                   | ref.                 | ref.                   | ref.                 |
| 20-24                | 4.0*** (3.1-5.2)       | 1.4 (0.6 - 3.2)      | 4.5***(3.0-6.7)        | 3.9*** (2.1 - 7.2)   |
| 25-29                | 5.6***(4.3-7.3)        | 1.7 (0.8 - 3.6)      | 8.2***(5.1-13.2)       | 6.4*** (3.3 - 12.1)  |
| 30-39                | 3.2*** (2.5-4.2)       | 1.9 (0.8 - 4.5)      | 7.6*** (5.1-11.3)      | 5.5*** (3.0 - 10.2)  |
| 40-49                | 1.4 (0.9-1.9)          | 0.2 (0.01 - 1.9)     | 4.2*** (2.6-6.6)       | 3.0*** (1.6 - 5.7)   |
| Ethnicity            |                        |                      |                        |                      |
| Hill Brahmin/Chhetri | ref.                   | ref.                 | ref.                   | ref.                 |
| Terai caste          | 0.2*** (0.2-0.3)       | 0.6 (0.3 - 1.2)      | 1.3(0.9-1.8)           | 0.7 (0.4 - 1.1)      |
| Janajatis            | 0.6*** (0.5-0.8)       | 1.1 (0.7 - 1.8)      | 0.9(0.7-1.1)           | 0.9 (0.7 - 1.2)      |
| Dalit/Muslim/Other   | 0.4*** (0.3-0.6)       | 1.4 (0.8 - 2.4)      | 1.0(0.7-1.5)           | 1.0 (0.6 - 1.6)      |
| Education            |                        |                      |                        |                      |
| No education         | ref.                   | ref.                 | ref.                   | ref.                 |
| Primary              | 1.8*** (1.4-2.3)       | 0.8 (0.4 - 1.6)      | 1.5 (0.9-2.3)          | 1.5 (0.9 - 2.3)      |
| Secondary            | 2.3*** (1.9-2.9)       | 1.4 (0.7 - 2.6)      | 1.9** (1.2-2.8)        | 2.3*** (1.4 - 3.6)   |
| Higher               | 5.6*** (4.4-7.0)       | 2.1 (0.9 - 4.2)      | 1.9** (1.2-2.9)        | 1.7* (1.0 - 2.8)     |
| Place of residence   |                        |                      |                        |                      |
| Urban                | ref.                   | ref.                 | ref.                   | ref.                 |
| Rural                | 0.6** (0.5-0.8)        | 1.1 (0.8 - 1.7)      | 0.9 (0.7-1.3)          | 1.1 (0.8 - 1.5)      |
| Province             |                        |                      |                        |                      |
| Province no 1        | ref.                   | ref.                 | ref.                   | ref.                 |
| Province no 2        | 0.3(0.2-0.4)           | 0.8 (0.3 - 1.8)      | 2.6*** (1.7-4.1)       | 3.5*** (2.0 - 6.2)   |

| Characteristics                 | Women                  |                      | Men                    |                      |
|---------------------------------|------------------------|----------------------|------------------------|----------------------|
|                                 | Unadjusted OR (95% CI) | Adjusted OR (95% CI) | Unadjusted OR (95% CI) | Adjusted OR (95% CI) |
| Bagmati                         | 1.5* (1.0-2.2)         | 2.0* (1.1 - 3.8)     | 1.3(0.9-2.0)           | 1.2 (0.8 - 1.8)      |
| Gandaki                         | 1.4(0.9-2.0)           | 1.4 (0.8 - 2.8)      | 1.5(0.9-2.4)           | 1.5 (0.9 - 2.4)      |
| Lumbini                         | 1.7*(1.1-2.6)          | 2.3* (1.1 - 4.8)     | 1.5(0.9-2.4)           | 1.5 (0.9 - 2.5)      |
| Karnali                         | 0.9 (0.6-1.4)          | 1.9 (0.9 - 4.0)      | 0.9(0.6-1.6)           | 1.1 (0.6 - 1.8)      |
| Sudurpaschim                    | 2.4*** (1.6-3.6)       | 3.3** (1.5 - 7.0)    | 1.7*(1.1-2.7)          | 1.6* (1.0 - 2.4)     |
| Wealth quintile                 |                        |                      |                        |                      |
| Poorest                         | ref.                   | ref.                 | ref.                   | ref.                 |
| Poorer                          | 1.0 (0.7-1.3)          | 1.0 (0.6 - 1.7)      | 0.9 (0.7-1.3)          | 0.9 (0.6 - 1.3)      |
| Middle                          | 0.9 (0.7-1.3)          | 1.0 (0.5 - 1.9)      | 1.7** (1.2-2.5)        | 1.3 (0.9 - 2.0)      |
| Richer                          | 1.2 (0.9-1.7)          | 0.9 (0.5 - 1.6)      | 2.0*** (1.4-2.9)       | 1.6* (1.1 - 2.4)     |
| Richest                         | 2.5*** (1.8-3.4)       | 1.5 (0.7 - 3.1)      | 1.9*** (1.3-2.8)       | 1.7* (1.1 - 2.6)     |
| Occupation                      |                        |                      |                        |                      |
| Did not work                    | ref.                   | ref.                 | ref.                   | ref.                 |
| Agricultural                    | 0.8*(0.6-0.9)          | 0.7 (0.4 - 1.1)      | 1.6*(1.1-2.4)          | 0.8 (0.4 - 1.3)      |
| Professional/clerical           | 2.4*** (1.9-3.1)       | 1.2 (0.6 - 2.3)      | 2.2*** (1.5-3.4)       | 0.7 (0.4 - 1.2)      |
| Manual labor                    | 1.4** (1.1-1.7)        | 0.6 (0.3 - 1.1)      | 2.2*** (1.6-3.2)       | 0.7 (0.4 - 1.2)      |
| Comprehensive knowledge on HIV  |                        |                      |                        |                      |
| No                              | ref.                   | ref.                 | ref.                   | ref.                 |
| Yes                             | 2.6*** (2.2-2.9)       | 1.0 (0.7 - 1.5)      | 1.5*** (1.2-1.8)       | 1.4* (1.1 - 1.8)     |
| HIV discriminatory behavior     |                        |                      |                        |                      |
| No                              | ref.                   | ref.                 | ref.                   | ref.                 |
| Yes                             | 0.5*** (0.4-0.6)       | 0.7 (0.5 - 1.0)      | 0.9 (0.8-1.1)          | 1.2 (0.9 - 1.6)      |
| Any media exposure              |                        |                      |                        |                      |
| Not at all                      | ref.                   | ref.                 | ref.                   | ref.                 |
| At least once a week            | 3.1*** (2.3-4.1)       | 2.8** (1.4 - 5.3)    | 2.4*** (1.5-3.9)       | 1.7* (1.0 - 3.1)     |
| Less than once a week           | 3.3*** (2.5-4.3)       | 1.4 (0.7 - 2.6)      | 1.9** (1.2-3.0)        | 1.3 (0.8 - 2.3)      |
| Recent risky sexual activity    |                        |                      |                        |                      |
| No                              | -                      | -                    | ref.                   | ref.                 |
| Yes                             | -                      | -                    | 1.1 (0.7-1.6)          | 0.8 (0.5 - 1.2)      |
| Ever paid for sex               |                        |                      |                        |                      |
| No                              | -                      | -                    | ref.                   | ref.                 |
| Yes                             | -                      | -                    | 3.3*** (2.1-5.2)       | 2.1** (1.3 - 3.4)    |
| Knowledge for treatment for HIV |                        |                      |                        |                      |
| No                              | ref.                   | ref.                 | ref.                   | ref.                 |
| Yes                             | 1.1(0.9-1.3)           | 1.1 (0.8 - 1.6)      | 1.2 (0.9-1.4)          | 1.2 (0.9 - 1.5)      |
| Age at first sexual intercourse |                        |                      |                        |                      |
| >15 years                       | ref.                   | ref.                 | ref.                   | ref.                 |

| Characteristics                    | Women                  |                      | Men                    |                      |
|------------------------------------|------------------------|----------------------|------------------------|----------------------|
|                                    | Unadjusted OR (95% CI) | Adjusted OR (95% CI) | Unadjusted OR (95% CI) | Adjusted OR (95% CI) |
| 15-19 years                        | 1.4** (1.1-1.8)        | 1.2 (0.6 - 2.3)      | 1.2 (0.8-1.9)          | 1.3 (0.8 - 2.1)      |
| 20-24 years                        | 2.7*** (2.1-3.5)       | 0.7 (0.3 - 1.5)      | 1.3 (0.8-2.0)          | 1.1 (0.7 - 2.0)      |
| 25 and above years                 | 3.3*** (2.2-4.9)       | 1.3 (0.5 - 3.5)      | 1.5 (0.8-2.6)          | 1.6 (0.9 - 2.8)      |
| Number of lifetime sexual partners |                        |                      |                        |                      |
| 1                                  | ref.                   | ref.                 | ref.                   | ref.                 |
| 2+                                 | 0.9 (0.6-1.5)          | 0.9 (0.2 - 3.0)      | 1.5** (1.2-1.8)        | 1.6*** (1.2 - 2.0)   |
| Ever experienced sexual violence   |                        |                      |                        |                      |
| Not experienced                    | ref.                   | ref.                 | -                      | -                    |
| Experienced                        | 0.8 (0.6-1.2)          | 1.8 (0.9 - 3.3)      | -                      | -                    |
| Received all 4 ANC                 |                        |                      |                        |                      |
| Not received                       | ref.                   | ref.                 | -                      | -                    |
| Received                           | 3.1*** (2.4-3.9)       | 1.2 (0.8 - 1.8)      | -                      | -                    |
| Partner's education level          |                        |                      |                        |                      |
| No education                       | ref.                   | ref.                 | -                      | -                    |
| Primary                            | 1.9*** (1.4-2.7)       | 1.6 (0.6 - 3.7)      | -                      | -                    |
| Secondary                          | 3.7*** (2.8-5.0)       | 1.8 (0.7 - 4.5)      | -                      | -                    |
| Higher                             | 7.9*** (5.8-10.8)      | 2.0 (0.8 - 5.4)      | -                      | -                    |
| Place of recent delivery           |                        |                      |                        |                      |
| Elsewhere                          | ref.                   | ref.                 | -                      | -                    |
| Health facility                    | 5.7*** (4.9-6.5)       | 3.9*** (2.4 - 6.3)   |                        |                      |

\*\*\* p<0.001, \*\* p<0.01, \* p<0.05 (t-statistic)
